# Supplementary material for: MnO2 nanoflake/polyaniline nanorod hybrid nanostructures on graphene paper for high-performance flexible supercapacitor electrodes
Source: Royal Society of Chemistry journal article supplement (doi:10.1039/c5ta04008f), 2015-01-01
Supplement: c5ta04008f1.pdf [file c5ta04008f1.pdf]

## Supplementary Information

### **MnO<sub>2</sub> nanoflakes/polyaniline nanorods hybrid nanostructures on graphene paper for high-performance flexible supercapacitor electrodes**

HuailongLi<sup>a</sup>, Ying He<sup>a,\*</sup>, Vladimir Pavlinek<sup>b</sup>, Qilin Cheng<sup>a,b\*</sup>, Petr Saha<sup>b</sup>, Chunzhong Li<sup>a</sup>

<sup>a</sup> Key Laboratory for Ultrafine Materials of Ministry of Education, School of Materials Science and Engineering, East China University of Science and Technology, 200237 Shanghai, China.

<sup>b</sup> Centre of Polymer Systems, Tomas Bata University in Zlin, nam. T. G. Masaryka 5555, 760 01 Zlin, Czech Republic

E-mail: rehey@ecust.edu.cn; chengql@ecust.edu.cn;

Tel: +86 21 64253395; Fax:+86 21 64253395

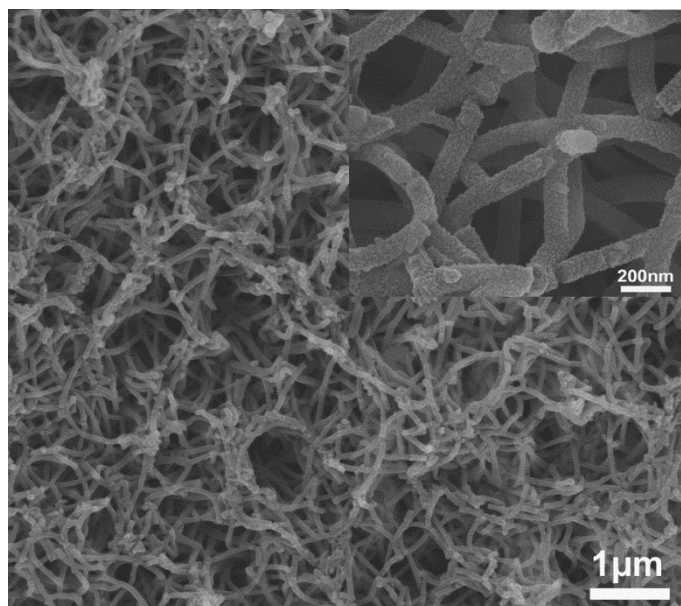

Fig. S1 SEM images of RGO/PANI composite paper. The inset shows the high-magnification of SEM image.

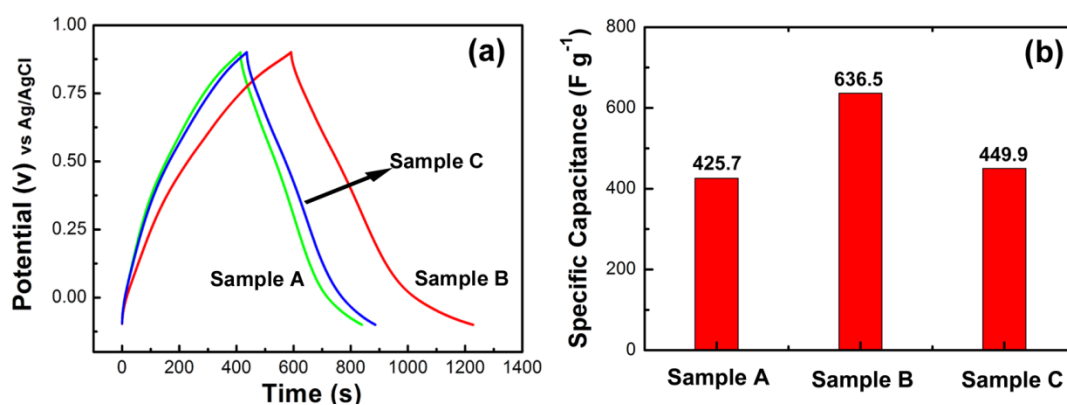

Fig. S2 (a) Charge-discharge profiles of Sample A, Sample B and Sample C at  $1.0 \text{ A g}^{-1}$ , (b) Specific capacitance of Sample A, Sample B and Sample C. Sample A- RGO/MnO<sub>2</sub>/PANI composite with 51.1% RGO, 43.5% MnO<sub>2</sub> and 5.4% PANI; Sample B- RGO/MnO<sub>2</sub>/PANI composite with 52.7% RGO, 36.7% MnO<sub>2</sub> and 10.6% PANI; Sample C- RGO/MnO<sub>2</sub>/PANI composite with 52.5% RGO, 30.2% MnO<sub>2</sub> and 17.3% PANI.
